# Supplementary material for: Apparent Temperature and Cause-Specific Emergency Hospital Admissions in Greater Copenhagen, Denmark
Source: PLoS One. 2011 Jul 29;6(7):e22904. doi: 10.1371/journal.pone.0022904 (PMC3146500; doi:10.1371/journal.pone.0022904)
Supplement: Text S2 — Longer lags in the cold period. (DOC) [file pone.0022904.s019.doc]

**Text S2**

**Longer lags in the cold period**

We investigated longer lags for Tappmax in the cold period, after adjusting for public holidays, weekly influenza rates (CVD and CBD hospital admissions) and PM10 (RD hospital admissions) (Figure S6). From the literature it is known that extreme temperature effects follow shorter lags, whilst cold effects may have a lag of up to 15 days, at least for *mortality* [1]. We did not observe any stronger effects between Tappmax, and CVD or CBD hospital admissions after 5 days cumulative exposure. The effect of cold on RD hospital admissions appears to be slightly stronger after 5 days cumulative exposure (compare CA5 to CA9 of Tappmax), but the effect remains similar after 9 days cumulative exposure (compare CA9 to CA15 of Tappmax). We thus reported results for only up to 5 days cumulative exposure. We followed this approach when adjusting for PM10 in the RD hospital admission models: The same lag was used for PM10 and Tappmax up to lag5, then lag5 for PM10 was used with lag6 to lag15 of Tappmax. The same cumulative average was used for PM10 and Tappmax up to CA5, then CA5 for PM10 was used with CA6 to CA15 of Tappmax. We selected this approach as a previous study observed PM10 effects on hospital admissions within a week [2].

**References**

1. Analitis A, Katsouyanni K, Biggeri A, Baccini M, Forsberg B, et al (2008) Effects of cold weather on mortality: results from 15 European cities within the PHEWE project. Am Epidemiol 168(12):1397-1408.
2. Andersen ZJ, Wahlin P, Raaschou-Nielsen O, Scheike T, Loft S (2007) Ambient particle source apportionment and daily hospital admissions among children and elderly in Copenhagen. J Expo Sci Environ Epidemiol 17(7):625-636.
